# Supplementary material for: Temperature-directed growth of highly pyridinic nitrogen doped, graphitized, ultra-hollow carbon frameworks as an efficient electrocatalyst for the oxygen reduction reaction
Source: Royal Society of Chemistry journal article supplement (doi:10.1039/c7ta04685e), 2017-01-01
Supplement: c7ta04685e1.pdf [file c7ta04685e1.pdf]

## Electronic Supplementary Information

### Temperature-Direct Growth Ultra-hollow Carbon Framework of Pyridinic Nitrogen-Doped as an Efficient Electrocatalyst for Oxygen Reduction Reaction

Bing He<sup>a</sup>, Fujian Liu\*<sup>a</sup> and Shouke Yan<sup>b</sup>

<sup>a</sup> College of Chemistry and Chemical Engineering, Shaoxing University, Huancheng West  
Road 508, Shaoxing, 312000, China. Email: fjliu@usx.edu.cn

<sup>b</sup> State Key Laboratory of Chemical Resource Engineering, Beijing University of Chemical  
Technology, Beijing, 100029, China.

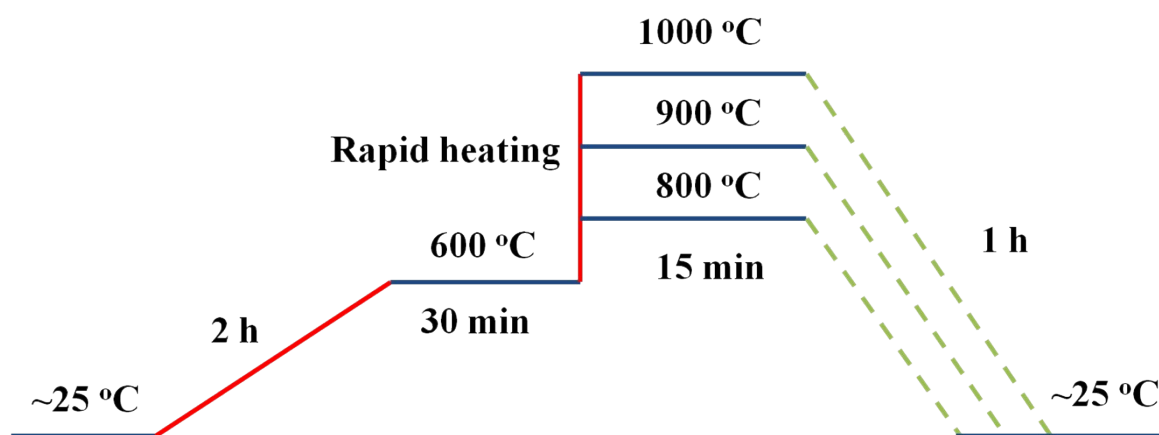

**Figure S1** Temperature-program for the synthesis of N-HCF-Ts.

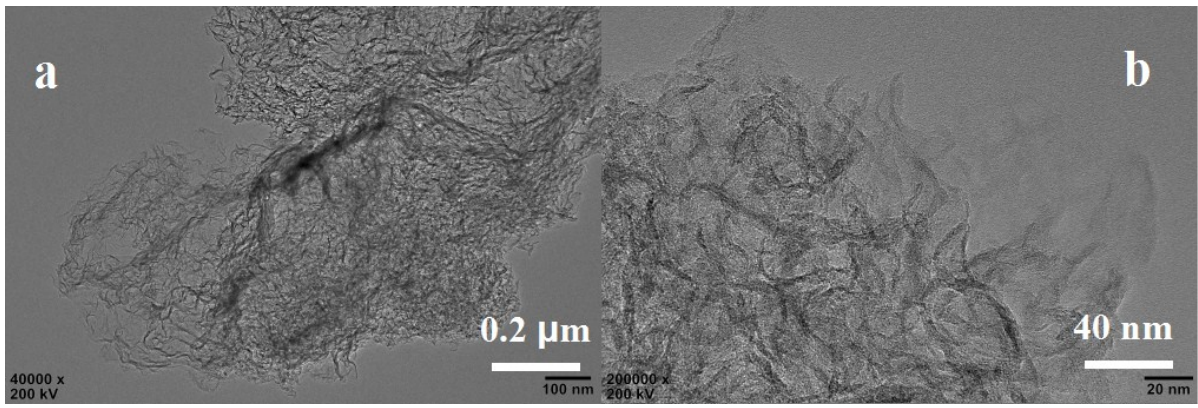

**Figure S2** TEM images of (a, b) N-HCF-1000.

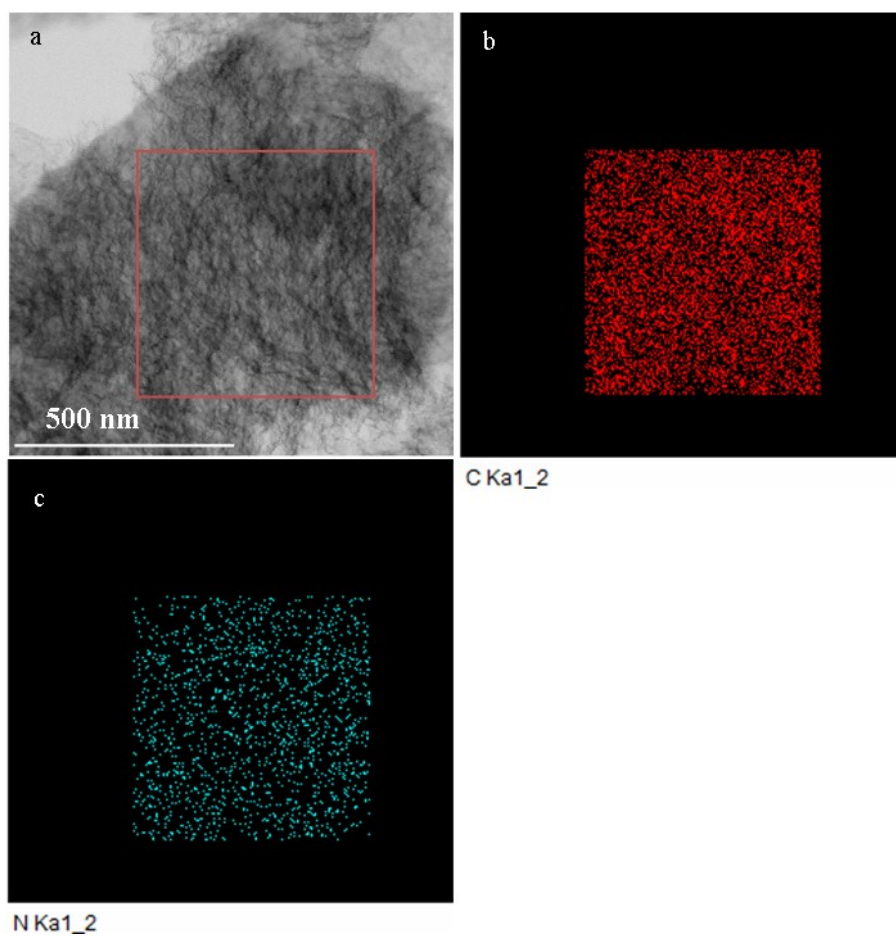

**Figure S3** (a) STEM image and (b, c) C, N elemental maps of N-HCF-900.

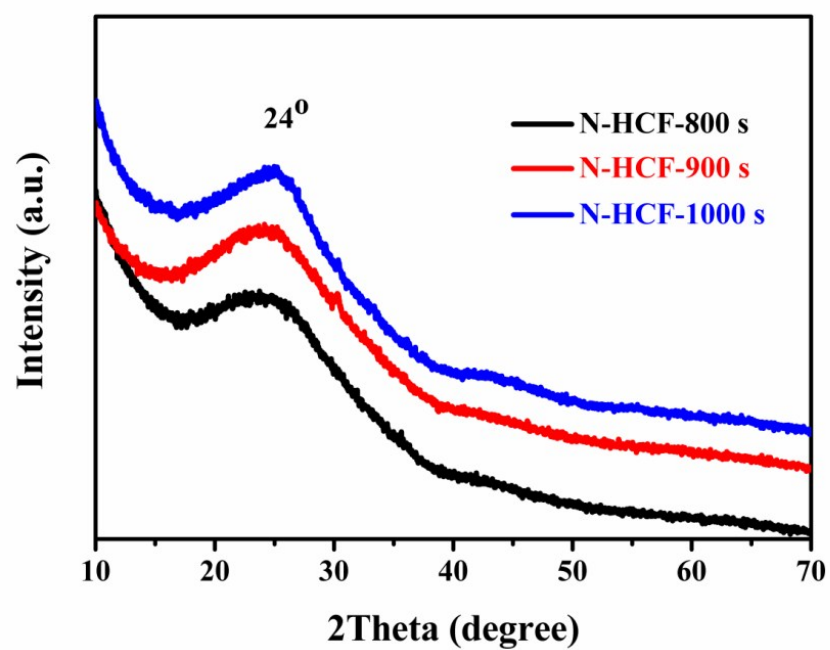

**Figure S4** Wide angle XRD patterns of N-HCF-Ts synthesized by slow heating for 2h at corresponding temperature.

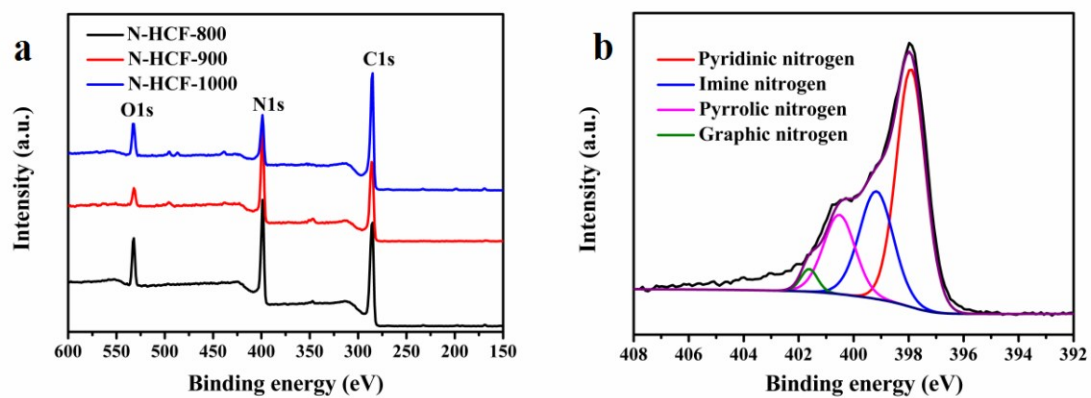

**Figure S5** (a) Survey XPS spectra of various N-HCF-Ts, (b) N1s of N-HCF-900 synthesized with normal heating procedures: From room temperature to 600 °C within 4 h, then the temperature was elevated to 900 °C for 1h.

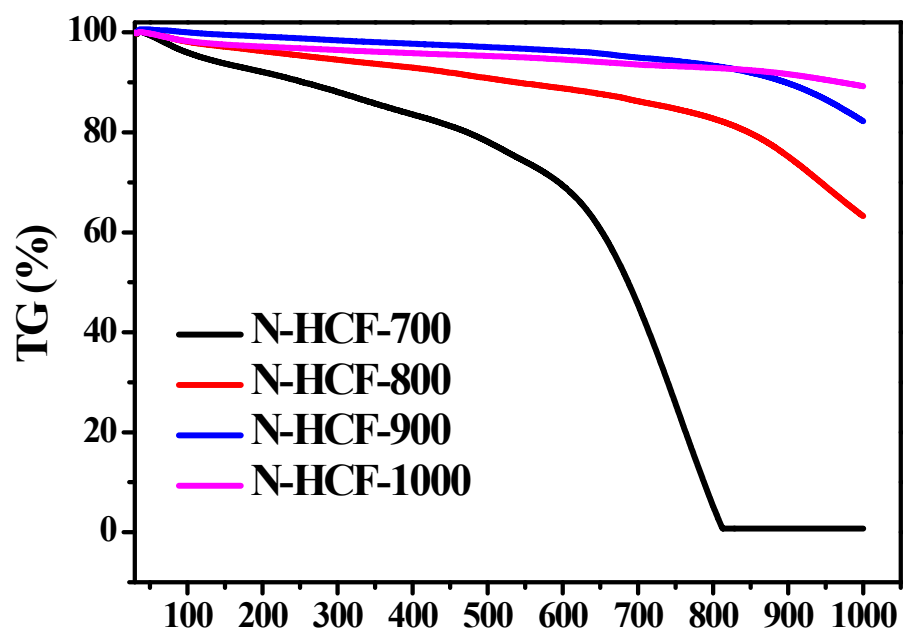

**Figure S6** TG curves of various N-HCF-Ts under flowing nitrogen condition.

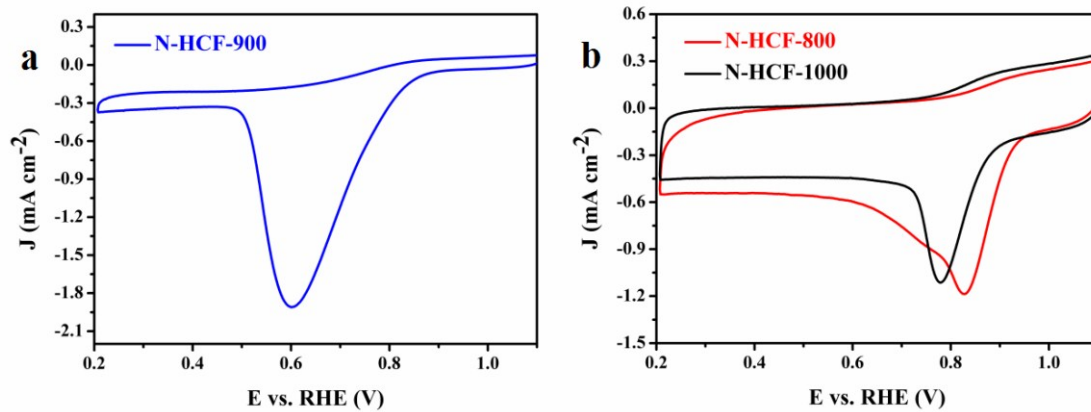

**Figure S7** (a) CV curves of N-HCF-900 synthesized with normal heating procedures and (b) CV curves of N-HCF-800 and N-HCF-1000 in O<sub>2</sub> saturated 0.1 M KOH aqueous solution with a scan rate of 10 mV·s<sup>-1</sup>.



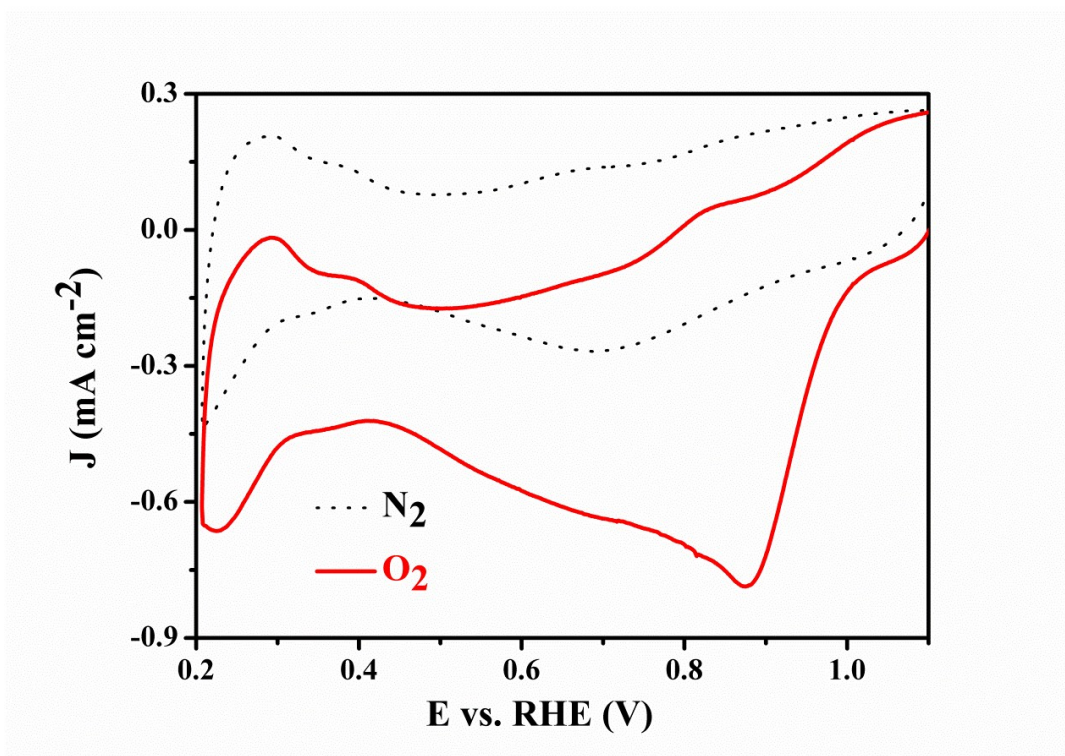

**Figure S8** CV curves of Pt/C in  $\text{N}_2$  and  $\text{O}_2$  saturated 0.1 M KOH aqueous solution with a scan rate of  $10 \text{ mV} \cdot \text{s}^{-1}$ .

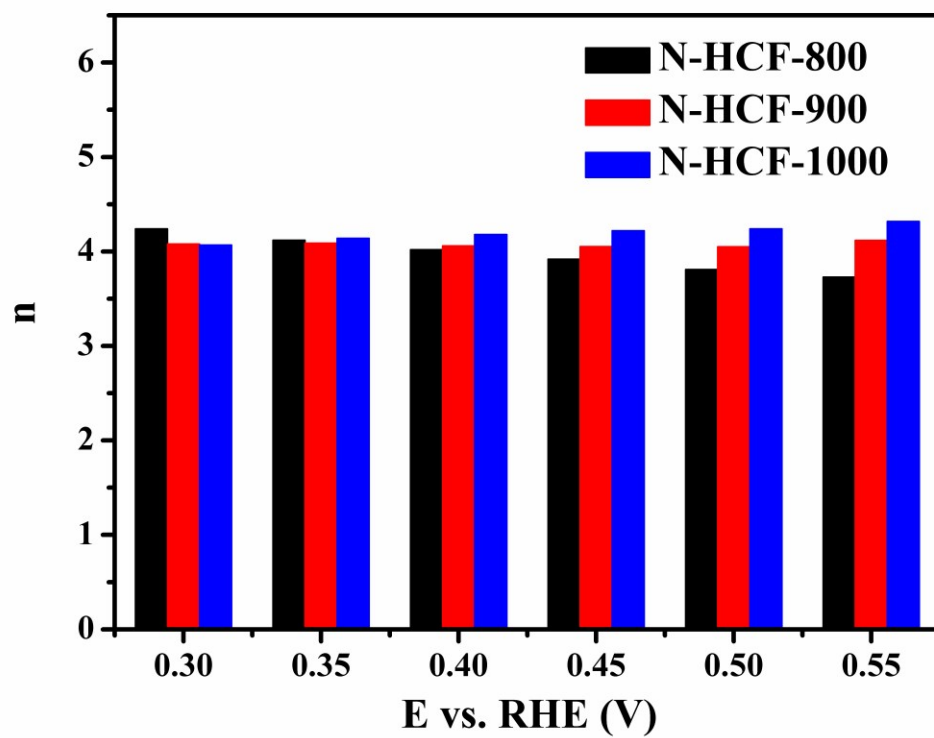

**Figure S9** The electron numbers of various N-HCF-Ts calculated from their K-L plots, respectively.

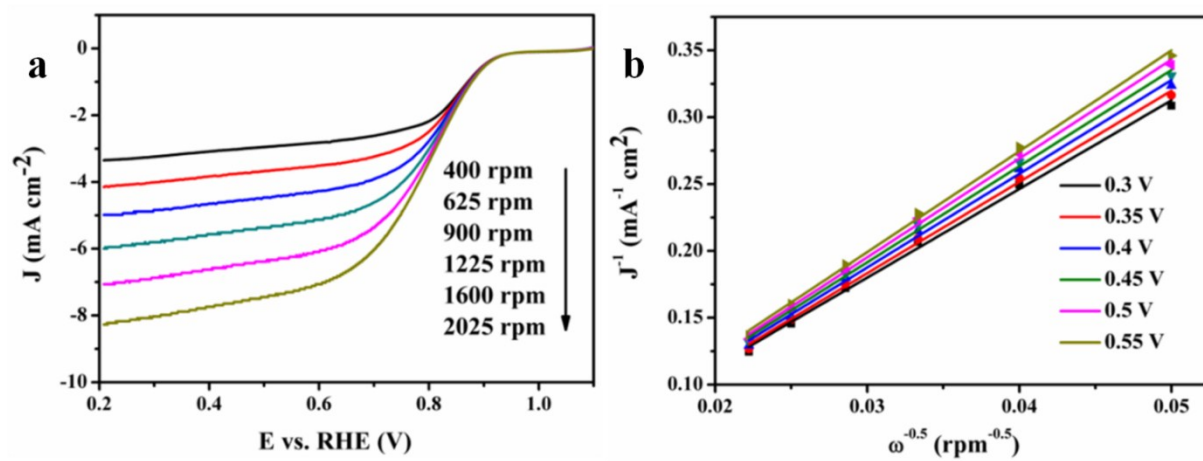

**Figure S10** a) LSV curves of N-HCF-800 at different rotating rates. b) K-L plots at different potentials based on the results of (a).

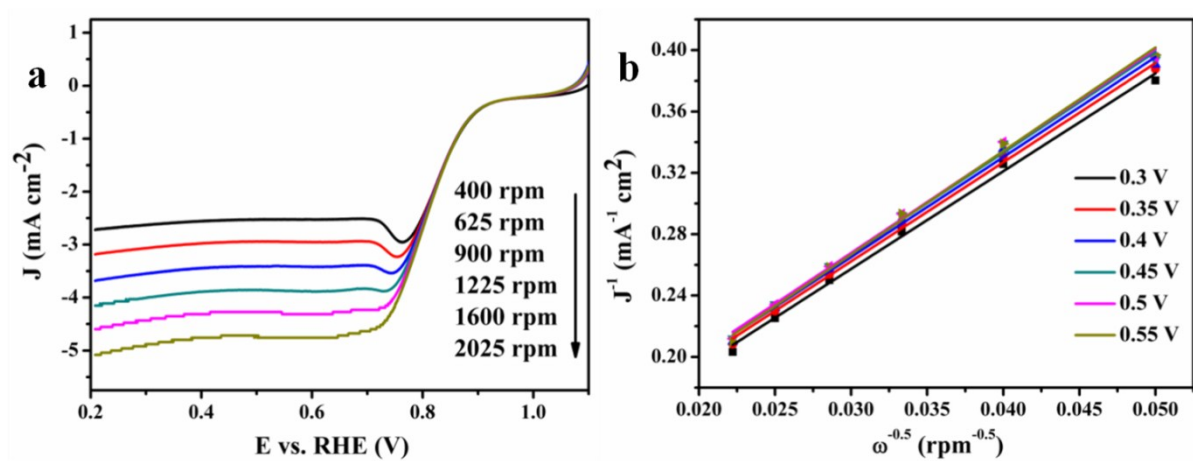

**Figure S11** a) LSV curves of N-HCF-1000 at different rotating rates. b) K-L plots at different potentials based on the results of (a).

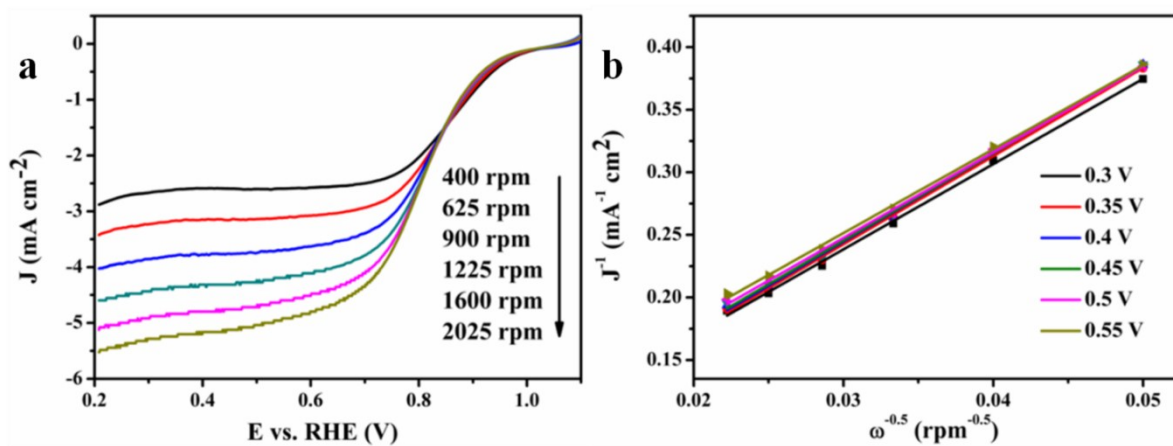

**Figure S12** a) LSV curves of Pt/C at different rotating rates. b) K-L plots at different potentials based on the results of (a). The electron numbers were calculated to be about 4.

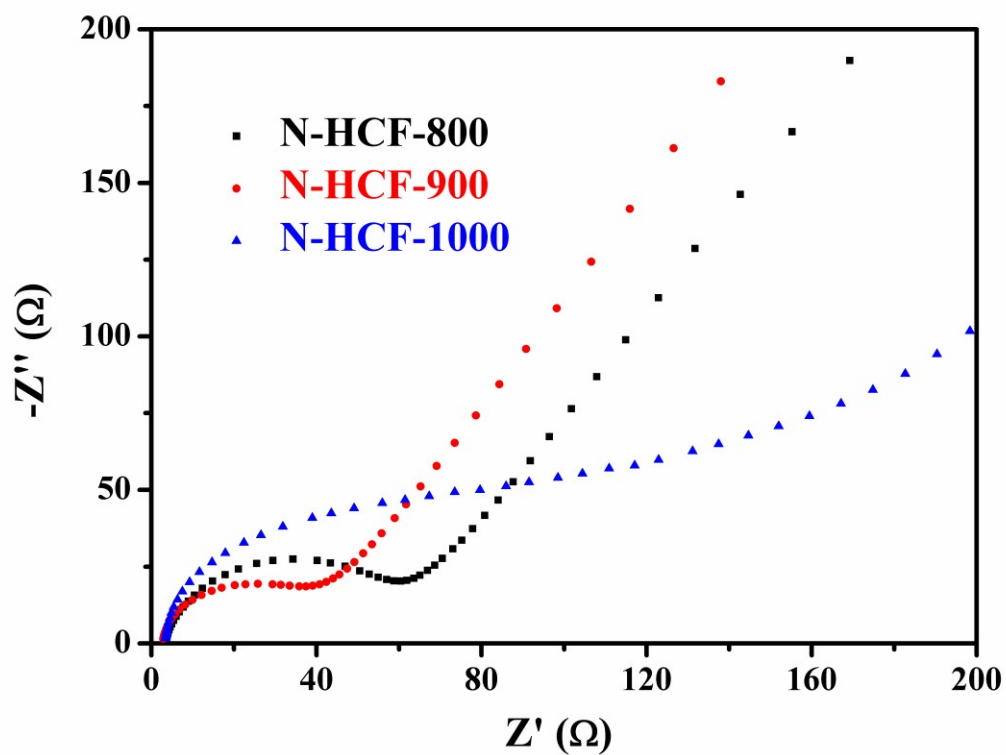

**Figure S13** Electrochemical impedance spectroscopy (EIS) analyses of the N-HCF-Ts catalysts. EIS were recorded in 0.1 M KOH at 1 V vs RHE with 5 mV ac potential from 1 Hz to 2000 kHz.

**Table S1** A summary of nitrogen contents, BET surface areas and pore volumes on other porous carbons reported in the literature.

| Porous carbons                     | N Contents (wt%) | S <sub>BET</sub> (m <sup>2</sup> /g) | V <sub>p</sub> (cm <sup>3</sup> /g) | References                                            |
|------------------------------------|------------------|--------------------------------------|-------------------------------------|-------------------------------------------------------|
| AS-4-800                           | -                | 2850                                 | 1.35                                | <i>Energy Environ. Sci.</i> , <b>2011</b> , 4, 1765   |
| SU-MAC-800                         | 2.58             | 2369                                 | 0.81                                | <i>J. Am. Chem. Soc.</i> , <b>2016</b> , 138, 1001    |
| NGF-1                              | -                | 851                                  | 4.28                                | <i>Adv. Mater.</i> , <b>2012</b> , 24, 4419           |
| HCM-DAH-1                          | 3.53             | 670                                  | 0.46                                | <i>J. Am. Chem. Soc.</i> , <b>2011</b> , 133, 11378   |
| SIL-6 (mesoporous carbon nitrides) | 45.9             | 939                                  | 0.92                                | <i>Energy Environ. Sci.</i> , <b>2011</b> , 4, 4668   |
| 3D HPG                             | -                | 1810                                 | 1.22                                | <i>Adv. Mater.</i> , <b>2013</b> , 25, 2474           |
| CAS40-1.75                         | 2.93             | 1101                                 | 4.31                                | <i>J. Mater. Chem. A</i> , <b>2013</b> , 1, 8961      |
| MDCM                               | -                | 2700                                 | 5.35                                | <i>Adv. Mater.</i> , <b>2015</b> , 27, 4903           |
| HPC5b2-1000                        | -                | 2517                                 | 5.53                                | <i>Energy Environ. Sci.</i> , <b>2014</b> , 7, 355    |
| NMCS-1                             | 7.65             | 363                                  | 0.48                                | <i>Angew. Chem. Int. Ed.</i> , <b>2015</b> , 54, 588  |
| ZnFumarate                         | -                | 4793                                 | 3.99                                | <i>Chem. Commun.</i> , <b>2013</b> , 49, 2192         |
| KCU-C 4-2                          | -                | 1327                                 | 4.1                                 | <i>Energy Environ. Sci.</i> , <b>2013</b> , 6, 1785   |
| THPC                               | 6.25             | 2870                                 | 2.19                                | <i>Energy Environ. Sci.</i> , <b>2013</b> , 6, 2497   |
| K900                               | -                | 2064.8                               | 1.41                                | <i>Nanoscale</i> , <b>2014</b> , 6, 12120             |
| CPC-700                            | 6.9              | 3242                                 | 1.51                                | <i>Chem. Mater.</i> , 2015, 27, 1349                  |
| A-NMC                              | 10.8             | 1417                                 | 0.91                                | <i>Adv. Funct. Mater.</i> , <b>2013</b> , 23, 2322    |
| Meso-PoPD                          | 9.5              | 685                                  | 0.71                                | <i>Nat. Comm.</i> , <b>2014</b> , 5, 4973             |
| N-CNS-120                          | 11.6             | 1077                                 | 3.06                                | <i>Adv. Mater.</i> , <b>2016</b> , 28, 5080           |
| MCN/C                              | 22.1             | 338                                  | 0.06                                | <i>Chem. Eng. J.</i> , <b>2012</b> , 203, 63.         |
| H-NMC-2.5                          | 13.1             | 537                                  | 0.17                                | <i>Adv. Funct. Mater.</i> , <b>2013</b> , 23, 2322    |
| NPC-2                              | 4.5              | 1256                                 | 0.52                                | <i>Environ. Sci. Technol.</i> <b>2015</b> , 49, 7063. |

|                              |                                             |             |             |                                             |
|------------------------------|---------------------------------------------|-------------|-------------|---------------------------------------------|
| a-NDC6                       | 4.2                                         | 1360        | 0.57        | <i>Chem. Commun.</i> <b>2012</b> , 48, 735. |
| <b>N-HCF-1000</b>            | <b>13.4 (60.1 %<br/>pyridinic nitrogen)</b> | <b>1073</b> | <b>6.45</b> | <b>This work</b>                            |
| <b>N-HCF-900</b>             | <b>19.8 (60.3 %<br/>pyridinic nitrogen)</b> | <b>1434</b> | <b>8.47</b> | <b>This work</b>                            |
| <b>N-HCF-800</b>             | <b>24.3 (61.2 %<br/>pyridinic nitrogen)</b> | <b>897</b>  | <b>4.45</b> | <b>This work</b>                            |
| <b>N-HCF-900<sup>a</sup></b> | <b>16.2 (50.3 %<br/>pyridinic nitrogen)</b> | <b>910</b>  | <b>4.68</b> | <b>This work</b>                            |

---

<sup>a</sup> Synthesized with normal heating procedures: From room temperature to 600 °C within 4 h, from 600 to 900 °C within 2 h and calcination at 900 °C for 1h.



**Table S2.** Summary of reported ORR performance of metal-free catalysts. All catalysts were tested in 0.1 M KOH.

| Sample            | Catalyst loading<br>(mg cm <sup>-2</sup> ) | Onset <sup>a</sup><br>potentials<br>(V vs. RHE) | Reduction <sup>b</sup> potentials<br>(V vs. RHE) | Limiting current density<br>@1600rpm<br>(mA cm <sup>-2</sup> ) | Reference                                            |
|-------------------|--------------------------------------------|-------------------------------------------------|--------------------------------------------------|----------------------------------------------------------------|------------------------------------------------------|
| <b>N-HCF-800</b>  | <b>0.2</b>                                 | <b>0.915</b>                                    | <b>0.83</b>                                      | <b>7.07</b>                                                    | <b>This work</b>                                     |
| <b>N-HCF-900</b>  | <b>0.2</b>                                 | <b>0.921</b>                                    | <b>0.83</b>                                      | <b>7.74</b>                                                    |                                                      |
| <b>N-HCF-1000</b> | <b>0.2</b>                                 | <b>0.875</b>                                    | <b>0.69</b>                                      | <b>4.60</b>                                                    |                                                      |
| <b>Pt/C</b>       | <b>0.2</b>                                 | <b>0.914</b>                                    | <b>0.87</b>                                      | <b>5.89</b>                                                    |                                                      |
| VA-NCNTs          | unknown                                    | unknown                                         | 0.75                                             | 4.1@1400rpm                                                    | <i>Science</i> <b>2009</b> , 323, 760                |
| PoPD              | 0.1                                        | unknown                                         | 0.83                                             | 5.8                                                            | <i>Nat. Commun.</i> <b>2014</b> , 5, 4973            |
| N-CNS             | 0.2                                        | 0.89                                            | 0.76                                             | 5.8                                                            | <i>Adv. Mater.</i> <b>2016</b> , 28, 5080            |
| NG                | 0.29                                       | unknown                                         | 0.80                                             | 7.8                                                            | <i>Angew. Chem. Int. Ed.</i> <b>2012</b> , 51, 9689  |
| CA-TCA            | 0.29                                       | 0.84                                            | 0.65                                             | 1.82                                                           | <i>Green Chem.</i> <b>2012</b> , 14, 1515            |
| NSG700            | 0.12                                       | 0.86                                            | 0.71                                             | 4.1                                                            | <i>Chem. Commun.</i> <b>2014</b> , 50, 4839          |
| NCNC              | 0.10                                       | 0.84                                            | 0.75                                             | 40@2500rpm                                                     | <i>Adv. Mater.</i> <b>2012</b> , 24, 5593            |
| N-graphene QDs    | unknown                                    | 0.97                                            | 0.71                                             | 12.2                                                           | <i>J. Am. Chem. Soc.</i> <b>2012</b> , 134, 18932    |
| NG                | 0.14                                       | 0.87                                            | 0.65                                             | 2.85                                                           | <i>Adv. Energy Mater.</i> <b>2012</b> , 2, 884       |
| PDI- NOMGAs       | 0.026                                      | 0.84                                            | 0.71                                             | 6.1                                                            | <i>Angew. Chem. Int. Ed.</i> <b>2010</b> , 122, 2619 |
| VA-BCN            | unknown                                    | unknown                                         | 0.70                                             | 5.7@1000rpm                                                    | <i>Angew. Chem. Int. Ed.</i> <b>2011</b> , 50, 11756 |
| NDCN              | 0.61                                       | 0.96                                            | 0.69                                             | 5.68                                                           | <i>Angew. Chem. Int. Ed.</i> <b>2014</b> , 126, 1596 |

|            |         |         |      |      |                                                   |
|------------|---------|---------|------|------|---------------------------------------------------|
| NG         | 0.038   | 0.93    | 0.65 | 7.8  | <i>Adv. Funct. Mater.</i> <b>2012</b> , 22, 3634  |
| POMC       | unknown | 0.86    | 0.78 | 5.3  | <i>J. Am. Chem. Soc.</i> <b>2012</b> , 134, 16127 |
| S-graphene | unknown | unknown | 0.68 | 7.2  | <i>ACS Nano</i> <b>2012</b> , 6, 205              |
| PG         | 0.05    | 0.92    | 0.60 | 3.67 | <i>Adv. Mater.</i> <b>2013</b> , 25, 4932         |
| NHCS       | 0.32    | unknown | 0.69 | 5.87 | <i>Nanoscale</i> <b>2016</b> , 8, 18134           |
| N, S-HCS   | unknown | 0.93    | 0.78 | 5.5  | <i>Nanoscale</i> <b>2016</b> , 8, 19086           |

<sup>a</sup>The potential value corresponding to 5% of the diffusion-limited current density ( $J_L$ ) was defined as the onset potential.<sup>[1]</sup>

## References

- 1 X. Zhou, J. Qiao, L. Yang, J. Zhang, *Adv. Energy Mater.* 2014, 4, 1301523.
